# Supplementary material for: Exploring the Transcriptional Crosstalk Between Adipose Tissue and Locoregional Recurrence in Breast Cancer Using Independent Component Analysis
Source: Research Square preprint supplement (doi:10.21203/rs.3.rs-8544684/v1), 2026-02-04
Supplement: Supplementary file 2 [file d101f4154e80b47b6a9cf6ab.xlsx]

## Sheet: projection_on_single_cell_data_
Transcriptional components	Number of single cells with significant activity (out of 10,000)
TC371	5600
TC257	2914
TC400	2850
TC350	1598
TC401	1349
TC237	1321
TC309	1293
TC152	1245
TC393	1217
TC37	851
TC259	735
TC95	648
TC98	648
TC175	597
TC296	490
TC358	456
TC207	423
TC54	381
TC231	377
TC126	344
TC17	336
TC408	268
TC283	245
TC341	242
TC246	225
TC395	221
TC146	202
TC271	191
TC293	159
TC143	148
TC39	142
TC167	135
TC386	127
TC396	123
TC60	81
