# Supplementary material for: Exploring the Transcriptional Crosstalk Between Adipose Tissue and Locoregional Recurrence in Breast Cancer Using Independent Component Analysis
Source: Research Square preprint supplement (doi:10.21203/rs.3.rs-8544684/v1), 2026-02-04
Supplement: Supplementary file 4 [file da5df25e33592089ee725636.xlsx]

## Sheet: GSEA_max_TC
TC	Maximum enrichment score
TC 354	5.57852
TC 31	5.5519
TC 226	5.53934
TC 306	5.50252
TC 25	5.45427
TC 343	5.41586
TC 43	5.39628
TC 347	5.36305
TC 359	5.34899
TC 335	5.30939
TC 277	5.30401
TC 363	5.24442
TC 211	5.1977
TC 388	5.15828
TC 392	5.14696
TC 256	5.12742
TC 38	5.10818
TC 33	5.09865
TC 312	5.05973
TC 64	5.04111
TC 313	5.04068
TC 361	5.01506
TC 16	4.97725
TC 221	4.96174
TC 159	4.91401
TC 372	4.88061
TC 136	4.87931
TC 121	4.866
TC 239	4.84729
TC 156	4.78498
TC 5	4.75843
TC 411	4.7316
TC 340	4.72638
TC 122	4.70283
TC 91	4.69604
TC 402	4.66007
TC 12	4.64663
TC 399	4.6211
TC 365	4.62004
TC 410	4.61451
TC 336	4.58977
TC 9	4.58331
TC 339	4.57547
TC 258	4.57265
TC 333	4.56868
TC 287	4.53976
TC 337	4.52539
TC 345	4.52198
TC 322	4.51743
TC 379	4.50483
TC 319	4.49935
TC 21	4.42509
TC 97	4.40928
TC 266	4.39582
TC 356	4.39462
TC 311	4.3658
TC 398	4.35636
TC 325	4.3461
TC 352	4.30688
TC 253	4.30171
TC 383	4.28974
TC 85	4.28501
TC 366	4.26592
TC 208	4.23744
TC 390	4.23363
TC 282	4.23194
TC 403	4.20024
TC 20	4.19169
TC 264	4.1603
TC 275	4.12546
TC 10	4.11374
TC 290	4.09212
TC 376	4.0799
TC 353	4.05244
TC 32	4.0154
TC 316	4.00449
TC 407	3.94876
TC 323	3.92844
TC 351	3.80842
