# Supplementary material for: Exploring the Transcriptional Crosstalk Between Adipose Tissue and Locoregional Recurrence in Breast Cancer Using Independent Component Analysis
Source: Research Square preprint supplement (doi:10.21203/rs.3.rs-8544684/v1), 2026-02-04
Supplement: Supplementary file 5 [file e92d6db74a8b81cb22c29a19.xlsx]

## Sheet: Sheet1
TC	Number of genes in extreme valued region for each chromosome																								Total number of genes
	1	2	3	4	5	6	7	8	9	10	11	12	13	14	15	16	17	18	19	20	21	22	X	Y
TC 11																10									10
TC 368											10														10
TC 307		11																							11
TC 84																								12	12
TC 278											12														12
TC 330											13														13
TC 124		14																							14
TC 172					14																				14
TC 194																	14								14
TC 251																	15								15
TC 153					16																				16
TC 391																	16								16
TC 139																			17						17
TC 279																			17						17
TC 75											18														18
TC 104																	18								18
TC 334																	18								18
TC 101							19																		19
TC 173																	19								19
TC 176																	19								19
TC 196																	20								20
TC 157						21																			21
TC 192																	22								22
TC 293											22														22
TC 326																	22								22
TC 229							23																		23
TC 224																	25								25
TC 283											26														26
TC 149																	28								28
TC 213							28																		28
TC 318																	28								28
TC 320						28																			28
TC 79																	30								30
TC 161											31														31
TC 230								31																	31
TC 88										32															32
TC 107											32														32
TC 130											33														33
TC 197																33									33
TC 218																				33					33
TC 321																	34								34
TC 29																				36					36
TC 103																			36						36
TC 348																			36						36
TC 57																	37								37
TC 186																	37								37
TC 362																			37						37
TC 81											40														40
TC 2				41																					41
TC 331											43														43
TC 67														44											44
TC 269												45													45
TC 303															45										45
TC 46																	46								46
TC 108										46															46
TC 270																			46						46
TC 298																	46								46
TC 357												46													46
TC 387										46															46
TC 86								47																	47
TC 228										47															47
TC 234						47																			47
TC 58						49																			49
TC 204													50												50
TC 83												51													51
TC 299																	51								51
TC 59																						52			52
TC 167									52																52
TC 183																				52					52
TC 294								52																	52
TC 225								53																	53
TC 267								53																	53
TC 200											56														56
TC 304											56														56
TC 382																							56		56
TC 142	57																								57
TC 295																				57					57
TC 55			58																						58
TC 73																		58							58
TC 100														58											58
TC 115																				58					58
TC 96																			59						59
TC 119											59														59
TC 182											60														60
TC 305											60														60
TC 42												61													61
TC 193	61																								61
TC 53				63																					63
TC 112											63														63
TC 140			63																						63
TC 248					63																				63
TC 338								63																	63
TC 98											64														64
TC 181																			64						64
TC 271																65									65
TC 191																				69					69
TC 341																	70								70
TC 281										71															71
TC 327																		71							71
TC 28																72									72
TC 174						73																			73
TC 74																			74						74
TC 27										75															75
TC 397																			75						75
TC 317								76																	76
TC 374																			76						76
TC 102		77																							77
TC 141				78																					78
TC 150					78																				78
TC 198						78																			78
TC 188										79															79
TC 233								79																	79
TC 395																					79				79
TC 231										80															80
TC 254														80											80
TC 50																						83			83
TC 76	83																								83
TC 94			83																						83
TC 180						83																			83
TC 44																			84						84
TC 133							84																		84
TC 342					84																				84
TC 113											85														85
TC 329											85														85
TC 405																							87		87
TC 66		88																							88
TC 324																		88							88
TC 17	90																								90
TC 123							90																		90
TC 328																		90							90
TC 146														1									90		91
TC 189	92																								92
TC 261															92										92
TC 386								92																	92
TC 63																			93						93
TC 68				93																					93
TC 90													94												94
TC 111												94													94
TC 129							94																		94
TC 185																			94						94
TC 125			95																						95
TC 375								95																	95
TC 109		96																							96
TC 284									96																96
TC 406										96															96
TC 195							97																		97
TC 214																							97		97
TC 227	97																								97
TC 241	97																								97
TC 243			97																						97
TC 308																				97					97
TC 138				99																					99
TC 201									99																99
TC 132	101																								101
TC 268																			101						101
TC 360												101													101
TC 373														101											101
TC 238	102																								102
TC 34																			103						103
TC 92																	104								104
TC 162					104																				104
TC 135										105															105
TC 203						105																			105
TC 154																							106		106
TC 292																						107			107
TC 394															108										108
TC 30																				109					109
TC 56																			109						109
TC 219												109													109
TC 19															110										110
TC 54																110									110
TC 52						111																			111
TC 187																			111						111
TC 252																	111								111
TC 300																		111							111
TC 6																					112				112
TC 370																	112								112
TC 69															113										113
TC 116	114																								114
TC 240																							114		114
TC 143						116																			116
TC 255	116																								116
TC 265							116																		116
TC 35		117																							117
TC 145													117												117
TC 389			117																						117
TC 367																						118			118
TC 36	120																								120
TC 71																			120						120
TC 80														120											120
TC 274												120													120
TC 378												120													120
TC 222			122																						122
TC 236								123																	123
TC 242																123									123
TC 170				124																					124
TC 349												129													129
TC 276												131													131
TC 23																133									133
TC 99									134																134
TC 380																134									134
TC 134											136														136
TC 155			136																						136
TC 51														139											139
TC 217			140																						140
TC 369																						140			140
TC 205													141												141
TC 250														143											143
TC 209															144										144
TC 206	145																								145
TC 160	146																								146
TC 60																147									147
TC 202														149											149
TC 262									150																150
TC 78																			153						153
TC 114															154										154
TC 207				157																					157
TC 286	157																								157
TC 210												160													160
TC 178											161														161
TC 105																	162								162
TC 404		162																							162
TC 47	165																								165
TC 128																166									166
TC 232									167																167
TC 291					167																				167
TC 82		168																							168
TC 163	169																								169
TC 260																						169			169
TC 355	170																								170
TC 216																							177		177
TC 144							181																		181
TC 126						183																			183
TC 175					183																				183
TC 118												184													184
TC 247							189																		189
TC 169									191																191
TC 223			191																						191
TC 165		194																							194
TC 332					195																				195
TC 381	195																								195
TC 127		203																							203
TC 147										205															205
TC 72		207																							207
TC 61			220																						220
