# Supplementary material for: Exploring the Transcriptional Crosstalk Between Adipose Tissue and Locoregional Recurrence in Breast Cancer Using Independent Component Analysis
Source: Research Square preprint supplement (doi:10.21203/rs.3.rs-8544684/v1), 2026-02-04
Supplement: Supplementary file 7 [file f3d66f0633c4dbc3ebc15ae7.xlsx]

## Sheet: Blad1
Supplemental table 5. Difference in activity pattern of the biologically enriched TCs between the breast cancer samples and adipose tissue samples
Tissue component	Log transformed P value from MWU	Difference between median
TC1	190.68	0.0457177
TC2	76.2567	0.0123436
TC3	153.14	-0.0074313
TC4	163.772	0.0182882
TC6	54.1452	-0.012075
TC7	> 317	-0.0347411
TC8	23.5991	-0.0113374
TC11	7.3161	0.00330384
TC13	85.2746	0.0255335
TC14	147.074	0.00669928
TC15	142.022	0.0201516
TC17	> 317	-0.0399418
TC18	51.6902	0.0202297
TC19	117.355	0.027818
TC22	215.737	0.0222579
TC23	201.269	0.0288541
TC24	4.14247	0.00340535
TC26	285.8	0.0526915
TC27	3.22663	0.00371073
TC28	6.8413	-0.00603689
TC29	285.207	-0.022543
TC30	143.849	-0.0137046
TC34	105.464	-0.0163827
TC35	77.9205	-0.0145962
TC36	54.7088	0.0134568
TC37	46.1427	-0.0070319
TC39	> 317	-0.136964
TC40	78.1155	-0.011584
TC41	106.209	-0.0187396
TC42	125.282	0.0182672
TC44	3.05306	-0.00236494
TC45	5.80632	-0.00253886
TC46	94.5462	0.0206452
TC47	232.51	-0.020287
TC48	241.441	0.0103847
TC49	> 317	-0.0647546
TC50	55.1265	-0.0104705
TC51	47.1233	0.0187516
TC52	1.28565	0.000931605
TC53	148.605	-0.0212738
TC54	64.1533	-0.0155763
TC55	79.9252	0.019195
TC56	193.382	-0.0204924
TC57	78.2658	-0.00781892
TC58	> 317	-0.0296919
TC59	0.220321	0.00185801
TC60	3.65295	0.0018372
TC61	11.487	-0.010285
TC62	> 317	0.0591153
TC63	265.644	-0.0212761
TC65	17.4239	0.0105745
TC66	15.3024	-0.00497953
TC67	24.0843	0.0115229
TC68	46.1398	0.0190544
TC69	42.4064	0.0155527
TC70	1.44433	-0.000973189
TC71	113.11	-0.0166212
TC72	93.4307	0.0167432
TC73	77.8023	0.0148327
TC74	1.40571	-0.00078033
TC75	77.3765	-0.0128959
TC76	288.042	-0.0337164
TC77	147.993	0.0505903
TC78	232.793	-0.0276952
TC79	40.9133	0.00798375
TC80	10.9399	0.00753746
TC81	77.6567	0.0146271
TC82	178.63	0.0270265
TC83	255.092	0.0260327
TC84	146.779	-0.0177759
TC86	153.844	-0.0142752
TC87	169.01	0.0218316
TC88	85.5362	-0.010307
TC89	> 317	-0.1012
TC90	4.27228	0.00436554
TC92	133.332	0.0154059
TC93	156.275	-0.00582635
TC94	21.4206	0.0096779
TC95	201.196	-0.0137633
TC96	148.842	-0.0133316
TC98	219.274	0.023976
TC99	94.5446	-0.0197095
TC100	11.6869	-0.0046661
TC101	58.758	-0.00559906
TC102	67.8384	-0.0116652
TC103	158.259	0.0153062
TC104	23.7278	0.00758449
TC105	9.32707	-0.00512249
TC106	1.68955	-0.0044463
TC107	28.8263	0.00583171
TC108	> 317	0.0275078
TC109	122.734	0.032825
TC110	27.0997	-0.0251947
TC111	175.525	0.0328123
TC112	90.5222	0.00906045
TC113	11.4458	-0.00421046
TC114	1.87036	0.00148327
TC115	130.978	-0.0218102
TC116	146.588	0.0281062
TC117	5.47083	0.00442451
TC118	0.55028	-0.000777491
TC119	1.70423	4.14161e+09
TC120	120.394	0.0921448
TC123	169.182	-0.0169869
TC124	29.7845	-0.00472071
TC125	54.2726	0.00747883
TC126	219.828	-0.0319021
TC127	21.1714	0.012658
TC128	170.915	-0.0287814
TC129	195.763	-0.0220597
TC130	87.4976	-0.00995289
TC131	221.689	-0.0538475
TC132	27.3544	-0.00670305
TC133	134.463	-0.0156327
TC134	0.543853	0.00222946
TC135	14.676	-0.00451141
TC137	271.175	-0.0446303
TC138	21.8455	-0.00942141
TC139	> 317	0.042013
TC140	246.437	-0.0179692
TC141	12.7928	0.00716527
TC142	97.8285	0.0161697
TC143	153.764	-0.0215432
TC144	159.664	-0.0189189
TC145	3.49809	0.00879989
TC146	22.1685	-0.0040848
TC147	44.6927	0.0166335
TC148	48.1602	-0.00414302
TC149	52.9309	0.00946171
TC150	123.89	0.0288565
TC151	18.3897	-0.00631371
TC152	11.4249	0.0187328
TC153	3.04243	0.00585609
TC154	240.429	-0.0235135
TC155	56.9813	0.0211121
TC157	43.9748	-0.00822865
TC158	43.1863	0.0113868
TC160	253.232	0.0432626
TC161	47.752	-0.00748624
TC162	101.494	-0.0158301
TC163	89.0457	-0.0217244
TC164	17.0834	-0.0145136
TC165	34.2318	0.0103316
TC166	228.734	0.0279455
TC167	93.6138	-0.010344
TC168	59.8453	0.0220488
TC169	39.5248	0.0155286
TC170	119.426	0.0268666
TC171	0.795931	0.00463548
TC172	151.713	-0.0150585
TC173	14.694	-0.00327037
TC174	19.3206	0.00699152
TC175	88.8196	0.0206047
TC176	56.2322	0.00854486
TC177	211.109	0.0280099
TC178	14.0171	0.00673408
TC179	> 317	0.253708
TC180	105.819	-0.0172515
TC181	56.1416	-0.00992721
TC182	15.4859	-0.00519294
TC183	94.2267	-0.0109749
TC184	> 317	0.145852
TC185	229.935	-0.0215872
TC186	78.3243	-0.00933945
TC187	0.278405	-0.000422432
TC188	3.55767	0.00546504
TC189	72.2786	0.012924
TC190	> 317	-0.144458
TC191	58.4372	-0.0081317
TC192	48.4823	0.00584043
TC193	229.916	-0.0211804
TC194	84.4109	-0.00723548
TC195	156.266	-0.0150317
TC196	121.806	0.00926655
TC197	4.1569	0.00238123
TC198	0.368998	0.00162095
TC199	207.825	-0.0216719
TC200	4.64561	0.00513065
TC201	158.008	0.0266266
TC202	21.241	0.00884387
TC203	4.70693	0.000728751
TC204	2.86977	-0.00140175
TC205	66.5162	0.0160523
TC206	39.6131	0.00728835
TC207	36.6526	0.0178084
TC209	11.6494	0.0101615
TC210	205.65	0.031009
TC212	59.1768	0.0272331
TC213	303.822	-0.0213601
TC214	110.415	0.0291328
TC215	2.97702	0.00884838
TC216	164.735	0.0260747
TC217	53.129	0.0159088
TC218	224.419	-0.0190029
TC219	3.93081	-0.00305015
TC220	144.693	0.0264735
TC222	76.2684	0.0187958
TC223	74.4875	-0.0145931
TC224	7.8092	-0.00161139
TC225	> 317	-0.0417018
TC227	51.8049	0.00864524
TC228	122.675	-0.113016
TC229	50.7236	0.00840716
TC230	12.8603	-0.00421122
TC231	115.301	-0.0899593
TC232	110.759	0.0206442
TC233	2.1457	0.000287555
TC234	111631638184764	-0.0132474
TC235	189.126	0.0393633
TC236	10.9071	0.00438456
TC237	54.9964	0.098289
TC238	118.139	-0.0157518
TC240	3.74282	-0.0147098
TC241	38.9767	-0.00730574
TC242	4.75093	-0.00991201
TC243	299.87	0.0458439
TC244	44.7215	-0.0249145
TC245	51.1143	-0.00906984
TC246	0.384136	0.0119143
TC247	51.1572	0.0192535
TC248	218.767	-0.0160564
TC249	29.3923	-0.00843279
TC250	0.0543253	-0.00157343
TC251	101.817	-0.00862451
TC252	68.6302	0.0170343
TC254	5.07819	0.0136857
TC255	127.026	0.174442
TC257	212.816	-0.178543
TC259	> 317	-0.115451
TC260	48.6341	0.0766117
TC261	45.0372	0.0819695
TC262	107.076	-0.0160117
TC263	23.6658	-0.00763873
TC265	104.429	0.0193513
TC267	34.2595	-0.00545544
TC268	3.77036	-0.029629
TC269	288.814	-0.173919
TC270	200.825	0.0230039
TC271	28.7747	-0.030071
TC272	25.5509	0.0162818
TC273	274.352	-0.0241584
TC274	272.744	-0.170044
TC276	5.67041	0.0259031
TC278	2.24224	-0.000368564
TC279	60.0023	-0.00623331
TC280	> 317	-0.280192
TC281	20.0171	0.00996354
TC283	42.2046	-0.0112946
TC284	28.5734	0.00430698
TC285	187.96	0.0338768
TC286	113.414	0.184482
TC288	242.583	0.0208832
TC289	126.257	0.0175617
TC291	28.7838	0.0571956
TC292	59.941	-0.0118001
TC293	225.802	-0.0125639
TC294	1.59572	0.00741019
TC295	> 317	-0.0291785
TC296	3.13443	-0.00169523
TC297	190.899	-0.019613
TC298	46.1483	0.00708575
TC299	52.0059	-0.00808513
TC300	92.6134	-0.0841123
TC301	31.3644	-0.118667
TC302	> 317	-0.241377
TC303	58.7095	0.0706903
TC304	88.2188	-0.157884
TC305	82.8482	-0.0837689
TC307	121.391	0.00938042
TC308	140.603	-0.0158844
TC309	22.4297	0.0176586
TC310	13.8113	-0.0707883
TC314	19.9508	-0.12906
TC315	0.329934	0.00394479
TC317	33.14	-0.0417121
TC318	174.44	-0.0144154
TC320	36.6427	0.0146594
TC321	4.21726	0.00351176
TC324	68.2951	-0.0547292
TC326	104.062	0.0532126
TC327	106.316	-0.020658
TC328	80.3315	-0.0475384
TC329	68.3155	-0.123566
TC330	89.7875	-0.125752
TC331	80.8062	-0.152257
TC332	26.0595	-0.0395809
TC334	33.2156	-0.00504422
TC338	69.3478	-0.0173907
TC341	119.375	-0.0159615
TC342	10.8064	-0.0212749
TC344	61.4843	-0.0269373
TC346	> 317	-0.265563
TC348	37.3182	0.00955553
TC349	11.5937	-0.0328004
TC350	31.1331	0.0948043
TC355	6.14462	0.00612438
TC357	30.1242	0.0423764
TC358	> 317	-0.021973
TC360	286.931	-0.226051
TC362	104.98	0.0155264
TC364	205.331	0.0448825
TC367	47.5665	0.0557083
TC368	196.496	-0.0133748
TC369	55.4724	0.0563001
TC370	42.9009	0.0147298
TC371	> 317	-0.241316
TC373	0.161017	-0.0084482
TC374	3.9771	0.0214358
TC375	34.311	-0.0557479
TC377	106.058	-0.0457002
TC378	127.487	-0.0630018
TC380	0.104952	0.00559461
TC381	86.3449	0.195372
TC382	14.364	-0.0263604
TC384	32.3963	0.0285809
TC385	24.2561	0.0197204
TC386	253.419	-0.0314755
TC387	27.3411	0.0136453
TC389	143.014	0.0228815
TC391	111.066	0.0572633
TC393	8.60495	0.032134
TC394	51.331	0.104272
TC395	120.779	-0.0117428
TC396	102.489	-0.022802
TC397	0.609826	-0.00207429
TC400	220.534	-0.222413
TC401	1.18103	0.0098493
TC404	1.73477	0.00303999
TC405	11.4907	-0.0188031
TC406	102.618	-0.137879
TC408	141.197	-0.0145289
TC409	118.425	0.0119097
