# Supplementary material for: Exploring the Transcriptional Crosstalk Between Adipose Tissue and Locoregional Recurrence in Breast Cancer Using Independent Component Analysis
Source: Research Square preprint supplement (doi:10.21203/rs.3.rs-8544684/v1), 2026-02-04
Supplement: Supplementary file 8 [file f417c163bbabecc2bfb9a6e1.xlsx]

## Sheet: Blad1
Supplemental table 3. Difference in activity pattern of the biologically enriched TCs between the different anatomical locations of adipose tissue
Tissue component	Log transformed p value from Kruskal wallis
TC1	50.845
TC2	56.0848
TC3	81.5374
TC4	85.6404
TC6	84.574
TC7	15.3999
TC8	45.5275
TC11	43.7779
TC13	59.2078
TC14	24.8015
TC15	37.1497
TC17	41.8335
TC18	50.2244
TC19	85.2673
TC22	103.488
TC23	30.4298
TC24	78.7671
TC26	64.9987
TC27	59.6378
TC28	87.7522
TC29	52.0639
TC30	56.7118
TC34	11.8387
TC35	72.2502
TC36	71.5209
TC37	62.6008
TC39	33.6508
TC40	86.6132
TC41	1.60905
TC42	64.4575
TC44	33.217
TC45	79.5551
TC46	107.694
TC47	36.8345
TC48	10.0963
TC49	8.93207
TC50	34.0986
TC51	96.3358
TC52	62.523
TC53	66.6043
TC54	85.0763
TC55	69.9546
TC56	78.3244
TC57	42.2874
TC58	59.355
TC59	52.0721
TC60	67.6015
TC61	59.9609
TC62	23.0969
TC63	30.006
TC65	26.7919
TC66	58.9664
TC67	55.0179
TC68	81.1783
TC69	70.0677
TC70	37.8581
TC71	36.9304
TC72	69.8017
TC73	81.5626
TC74	57.226
TC75	72.7454
TC76	92.7988
TC77	49.1404
TC78	51.7306
TC79	64.0142
TC80	78.9718
TC81	70.7542
TC82	76.268
TC83	83.0962
TC84	15.8374
TC86	49.3892
TC87	93.563
TC88	42.1716
TC89	5.72492
TC90	51.6492
TC92	32.3727
TC93	48.1271
TC94	73.4111
TC95	54.4899
TC96	26.5337
TC98	81.0281
TC99	69.5463
TC100	43.2232
TC101	32.9744
TC102	83.7282
TC103	40.7831
TC104	85.816
TC105	41.4163
TC106	23.2691
TC107	80.7012
TC108	69.9074
TC109	95.5486
TC110	19.1648
TC111	86.0698
TC112	25.9083
TC113	48.5244
TC114	29.971
TC115	76.1299
TC116	67.6672
TC117	13.2308
TC118	55.3042
TC119	65.5533
TC120	77.8564
TC123	47.6574
TC124	35.8351
TC125	72.4587
TC126	63.7451
TC127	62.762
TC128	58.6435
TC129	69.5357
TC130	53.2632
TC131	66.1153
TC132	36.3391
TC133	60.1057
TC134	79.6038
TC135	62.4832
TC137	95.0987
TC138	59.577
TC139	73.1242
TC140	29.1576
TC141	60.1321
TC142	74.7834
TC143	90.4861
TC144	66.7511
TC145	68.9443
TC146	41.6869
TC147	93.1278
TC148	58.8331
TC149	53.7389
TC150	75.9606
TC151	69.594
TC152	67.5295
TC153	62.0215
TC154	87.0329
TC155	75.4401
TC157	57.8823
TC158	49.2722
TC160	83.6786
TC161	62.6781
TC162	75.6859
TC163	110.224
TC164	47.5133
TC165	78.7787
TC166	15.3514
TC167	38.6574
TC168	75.9664
TC169	70.9058
TC170	78.5623
TC171	54.0764
TC172	22.0761
TC173	40.5579
TC174	63.2375
TC175	34.8964
TC176	15.2482
TC177	59.7243
TC178	68.4593
TC179	83.0545
TC180	73.2011
TC181	28.2464
TC182	28.4354
TC183	56.9648
TC184	79.6284
TC185	7.03921
TC186	68.0233
TC187	39.7811
TC188	69.5826
TC189	71.6641
TC190	77.0296
TC191	20.162
TC192	52.3226
TC193	70.9476
TC194	14.0389
TC195	77.8167
TC196	34.2095
TC197	48.4429
TC198	64.6539
TC199	80.8239
TC200	50.6558
TC201	73.8568
TC202	60.7909
TC203	70.0511
TC204	12.7972
TC205	81.1008
TC206	34.6408
TC207	74.947
TC209	82.8573
TC210	88.7743
TC212	29.3777
TC213	50.3158
TC214	72.7319
TC215	14.3368
TC216	99.5406
TC217	70.2474
TC218	76.5813
TC219	54.6244
TC220	43.7711
TC222	78.5125
TC223	72.9122
TC224	31.7324
TC225	61.7522
TC227	56.5315
TC228	35.5038
TC229	52.9418
TC230	61.6295
TC231	38.3483
TC232	76.2035
TC233	74.4944
TC234	70.136
TC235	33.2843
TC236	20.1339
TC237	37.592
TC238	62.6473
TC240	27.4834
TC241	23.8246
TC242	27.5279
TC243	63.4319
TC244	24.1701
TC245	99.0631
TC246	82.9003
TC247	74.1637
TC248	58.0999
TC249	28.0439
TC250	8.52308
TC251	29.2545
TC252	56.7869
TC254	6.98449
TC255	85.7201
TC257	67.3976
TC259	71.2293
TC260	59.1028
TC261	44.898
TC262	28.6843
TC263	76.2879
TC265	79.7751
TC267	38.3113
TC268	40.8372
TC269	34.8276
TC270	65.1422
TC271	26.3376
TC272	49.0933
TC273	44.3716
TC274	19.8908
TC276	42.8507
TC278	16.2974
TC279	36.0735
TC280	20.19
TC281	59.9807
TC283	38.8573
TC284	69.9904
TC285	55.1614
TC286	84.1917
TC288	28.4931
TC289	31.5877
TC291	37.2904
TC292	49.037
TC293	19.3987
TC294	31.9321
TC295	70.6579
TC296	37.6293
TC297	83.1796
TC298	82.4648
TC299	22.9489
TC300	24.4751
TC301	47.916
TC302	30.6892
TC303	45.3732
TC304	61.0359
TC305	42.1139
TC307	33.9603
TC308	73.5199
TC309	89.7307
TC310	48.7907
TC314	49.8574
TC315	71.9454
TC317	37.7463
TC318	14.1371
TC320	61.2121
TC321	8.97129
TC324	15.9621
TC326	8.44601
TC327	72.0819
TC328	6.89075
TC329	50.2645
TC330	71.9718
TC331	68.8628
TC332	47.8945
TC334	26.1984
TC338	69.7511
TC341	22.1905
TC342	44.8319
TC344	56.2391
TC346	43.2517
TC348	67.4874
TC349	49.2069
TC350	71.5638
TC355	65.6923
TC357	58.1612
TC358	41.7152
TC360	26.5637
TC362	52.8202
TC364	55.5073
TC367	65.1333
TC368	32.4842
TC369	64.9415
TC370	46.8264
TC371	64.4157
TC373	15.326
TC374	33.9447
TC375	42.9923
TC377	69.5363
TC378	34.8598
TC380	39.9777
TC381	83.1844
TC382	32.9669
TC384	81.6818
TC385	50.7364
TC386	52.1628
TC387	64.1543
TC389	58.0876
TC391	9.06875
TC393	38.2929
TC394	42.1764
TC395	58.607
TC396	46.1192
TC397	48.2046
TC400	67.8844
TC401	39.9481
TC404	58.3978
TC405	37.8367
TC406	38.139
TC408	73.863
TC409	37.9032
